# Supplementary material for: Hexavalent chromium waste removal via bioelectrochemical systems – a life cycle assessment perspective
Source: Royal Society of Chemistry journal article supplement (doi:10.1039/d3ew00344b), 2023-01-01
Supplement: d3ew00344b1.pdf [file d3ew00344b1.pdf]

Supplementary Information:

**Table A1: Life cycle inventory of hexavalent chromium waste removal**

FU=functional unit (1 kg chromium metal recovered)

| Chromium Waste Treatment Stage |           |           | Process used                                                                                                                                                                                                       | Notes                                                                                                                                                                                                                                      |
|--------------------------------|-----------|-----------|--------------------------------------------------------------------------------------------------------------------------------------------------------------------------------------------------------------------|--------------------------------------------------------------------------------------------------------------------------------------------------------------------------------------------------------------------------------------------|
| <i>Pre-treatment</i>           |           |           |                                                                                                                                                                                                                    |                                                                                                                                                                                                                                            |
| Screening                      | kg/FU     | kW/FU     |                                                                                                                                                                                                                    |                                                                                                                                                                                                                                            |
| Concrete                       | 0.0125432 |           | Concrete, normal {CH}  unreinforced concrete production, with cement CEM II/B   APOS, U; Concrete, high exacting requirements {CH}  concrete production, for building construction, with cement CEM II/B   APOS, U | 3% reinforcement was applied and allocated to high exacting requirements. The process "Inert waste, for final disposal {CH}  market for inert waste, for final disposal   APOS, U" was used for all concrete/construction waste treatment. |
| Steel                          | 0.0002726 |           | Steel, chromium steel 18/8 {RER}  steel production, converter, chromium steel 18/8   APOS, U                                                                                                                       |                                                                                                                                                                                                                                            |
| Energy const.                  |           | 0.0001103 | Electricity mix, AC, consumption mix, at consumer, 1kV - 60kV GB S                                                                                                                                                 |                                                                                                                                                                                                                                            |
|                                |           |           |                                                                                                                                                                                                                    |                                                                                                                                                                                                                                            |
| <i>Balancing</i>               |           |           |                                                                                                                                                                                                                    |                                                                                                                                                                                                                                            |
|                                | kg/FU     | kW/FU     |                                                                                                                                                                                                                    |                                                                                                                                                                                                                                            |
| Concrete                       | 0.2686278 |           | Concrete, normal {CH}  unreinforced concrete production, with cement CEM II/B   APOS, U; Concrete, high exacting requirements {CH}  concrete production, for building construction, with cement CEM II/B   APOS, U |                                                                                                                                                                                                                                            |
| Energy const.                  |           | 0.002192  | Electricity mix, AC, consumption mix, at consumer, 1kV - 60kV GB S                                                                                                                                                 |                                                                                                                                                                                                                                            |
| Pump material (Cast iron)      | 0.0011376 |           | Cast iron {RER}  production   APOS, U                                                                                                                                                                              |                                                                                                                                                                                                                                            |

|                                 |              |              |                                                                                                                                                                                                                    |
|---------------------------------|--------------|--------------|--------------------------------------------------------------------------------------------------------------------------------------------------------------------------------------------------------------------|
| Operations pump                 |              | 0.343257     | Electricity, high voltage {GB}  production mix   APOS, U                                                                                                                                                           |
| <b>Anolyte feed prep</b>        | <b>kg/FU</b> | <b>kW/FU</b> |                                                                                                                                                                                                                    |
| Concrete                        | 0.0189399    |              | Concrete, normal {CH}  unreinforced concrete production, with cement CEM II/B   APOS, U; Concrete, high exacting requirements {CH}  concrete production, for building construction, with cement CEM II/B   APOS, U |
| Steel mixer                     | 0.0039155    |              | Steel, chromium steel 18/8 {RER}  steel production, converter, chromium steel 18/8   APOS, U                                                                                                                       |
| Tank Pumps material (Cast iron) | 0.0017       |              | Cast iron {RER}  production   APOS, U                                                                                                                                                                              |
| Energy const.                   |              | 0.0003859    | Electricity grid mix 1kV-60kV, AC, consumption mix, at consumer, 1kV - 60kV GB S                                                                                                                                   |
| Operations                      |              | 0.4676139    | Electricity, high voltage {GB}  production mix   APOS, U                                                                                                                                                           |
| <b>Catholyte feed prep</b>      | <b>kg/FU</b> | <b>kW/FU</b> |                                                                                                                                                                                                                    |
| Concrete                        | 0.0021325    |              | Concrete, normal {CH}  unreinforced concrete production, with cement CEM II/B   APOS, U; Concrete, high exacting requirements {CH}  concrete production, for building construction, with cement CEM II/B   APOS, U |
| Steel mixer                     | 0.0011101    |              | Steel, chromium steel 18/8 {RER}  steel production, converter, chromium steel 18/8   APOS, U                                                                                                                       |
| Energy const.                   |              | 0.000085     | Electricity grid mix 1kV-60kV, AC, consumption mix, at consumer, 1kV - 60kV GB S                                                                                                                                   |
| Tank Pump material (Cast iron)  | 0.0014       |              | Cast iron {RER}  production   APOS, U                                                                                                                                                                              |

|                        |              |              |                                                                                                                                                                                                                                                                                                                                              |                                                                           |
|------------------------|--------------|--------------|----------------------------------------------------------------------------------------------------------------------------------------------------------------------------------------------------------------------------------------------------------------------------------------------------------------------------------------------|---------------------------------------------------------------------------|
| Operations             |              | 0.1170081    | Electricity, high voltage {GB}  production mix   APOS, U                                                                                                                                                                                                                                                                                     |                                                                           |
| Chemical(HCl)          | 1.42         |              | Hydrochloric acid, without water, in 30% solution state {RER}  market for   APOS, U                                                                                                                                                                                                                                                          |                                                                           |
|                        |              |              |                                                                                                                                                                                                                                                                                                                                              |                                                                           |
| <b>MFC reactor MoC</b> | <b>kg/FU</b> | <b>kW/FU</b> |                                                                                                                                                                                                                                                                                                                                              |                                                                           |
| Encasing               | 0.84         |              | Polymethyl methacrylate, sheet {RER}  production   APOS, U                                                                                                                                                                                                                                                                                   |                                                                           |
| Membrane               | 0.0026       |              | Tetrafluoroethylene {RER}  production   APOS, U                                                                                                                                                                                                                                                                                              |                                                                           |
| Anode (Carbon fibre)   | 0.162        |              | Polyacrylonitrile fibres (PAN), from acrylonitrile and methacrylate, prod. mix, PAN w/o additives EU-27 S; Electricity, high voltage {GB}  electricity production, natural gas, combined cycle power plant   APOS, U; Transport, freight, lorry 7.5-16 metric ton, EURO5 {RER}  transport, freight, lorry 7.5-16 metric ton, EURO5   APOS, U | losses in manufacturing was assumed to be the same for all the electrodes |
| Cathode (Carbon fibre) | 0.162        |              | Polyacrylonitrile fibres (PAN), from acrylonitrile and methacrylate, prod. mix, PAN w/o additives EU-27 S; Electricity, high voltage {GB}  electricity production, natural gas, combined cycle power plant   APOS, U; Transport, freight, lorry 7.5-16 metric ton, EURO5 {RER}  transport, freight, lorry 7.5-16 metric ton, EURO5   APOS, U |                                                                           |

|                          |           |           |                                                                                                                                                                                                                                |                                                                     |
|--------------------------|-----------|-----------|--------------------------------------------------------------------------------------------------------------------------------------------------------------------------------------------------------------------------------|---------------------------------------------------------------------|
| Electrode carbon brush   | 0.162     |           | Graphite {GLO}  market for   APOS, U;<br>Petroleum coke {GLO}  market for   APOS, U; Zinc {GLO}  market for   APOS, U; Polyphenylene sulfide {GLO}  market for   APOS, U; Extrusion, plastic pipes {RER}  production   APOS, U | Process energy for plastic extrusion was utilised for brush.        |
| Electrode surfacing      | 0.0042345 |           | Polymethyl methacrylate, sheet {RER}  production   APOS, U                                                                                                                                                                     | Input in simapro was combined with carbon fibre production from PAN |
| Cell component           | 0.0051962 |           | Polymethyl methacrylate, sheet {RER}  production   APOS, U                                                                                                                                                                     |                                                                     |
| Current collector        | 0.12      |           | Titanium, primary {GLO}  market for   APOS, U                                                                                                                                                                                  |                                                                     |
| Current collector        | 0.12      |           | Copper {RER}  production, primary   APOS, U                                                                                                                                                                                    |                                                                     |
| Electrode heat treatment |           | 0.0357845 | Electricity, high voltage {GB}  production mix   APOS, U                                                                                                                                                                       |                                                                     |
| Chemicals:H2O2           | 0.3371495 |           | Hydrogen peroxide, without water, in 50% solution state {RER}  hydrogen peroxide production, product in 50% solution state   APOS, U                                                                                           |                                                                     |
| Chemicals:H2SO4 (0.5 M)  | 0.4255059 |           | Sulfuric acid, at plant/kg/RNA                                                                                                                                                                                                 |                                                                     |
| Water: De-ionised water  | 0.291703  |           | Water, deionised, from tap water, at user {Europe without Switzerland}  water production, deionised, from tap water, at user   APOS, U                                                                                         |                                                                     |
| Chemicals: Acetone       | 0.1828838 |           | Acetone, liquid {RER}  production   APOS, U                                                                                                                                                                                    |                                                                     |
| Waste treatment          | 0.0290141 |           | Sewage sludge {GLO}  market for   Conseq, U                                                                                                                                                                                    |                                                                     |
|                          |           |           |                                                                                                                                                                                                                                |                                                                     |
| Avoided Electricity      |           | 4.4       | Electricity, high voltage {GB}  production mix   APOS, U                                                                                                                                                                       |                                                                     |
|                          |           |           |                                                                                                                                                                                                                                |                                                                     |

| <b>Chromium metal recovery unit</b>            | <b>kg/FU</b> |  |                                                                                                                                                                                                                                                                                                                                                                                        |                                                                                                                                                                                                                                                                                    |
|------------------------------------------------|--------------|--|----------------------------------------------------------------------------------------------------------------------------------------------------------------------------------------------------------------------------------------------------------------------------------------------------------------------------------------------------------------------------------------|------------------------------------------------------------------------------------------------------------------------------------------------------------------------------------------------------------------------------------------------------------------------------------|
| Tank material (PVC)                            | 0.7559196    |  | Polyvinyl chloride resin, at plant/RNA;<br>Polyethylene, high density, granulate {CH}  polyethylene, high density, granulate, recycled to generic market for high density PE granulate   APOS, U; Blow moulding {GLO}  market for   APOS, U; Steel, chromium steel 18/8, hot rolled {RER}  production   APOS, U                                                                        | The assumed recycled content-high density polyethylene (HDPE) was used in place of PVC, while virgin PVC remains unchanged                                                                                                                                                         |
| Chemicals: FeOH or NaOH                        | 1.1236257    |  | Sodium hydroxide, without water, in 50% solution state {RER}  chlor-alkali electrolysis, diaphragm cell   APOS, U                                                                                                                                                                                                                                                                      |                                                                                                                                                                                                                                                                                    |
| Chromium metal recovered                       | 1            |  | Chromium {RER}  production   APOS, U                                                                                                                                                                                                                                                                                                                                                   | Assumed for recovered metal                                                                                                                                                                                                                                                        |
| <b>End of Life (EoL) for process materials</b> | <b>kg/FU</b> |  |                                                                                                                                                                                                                                                                                                                                                                                        |                                                                                                                                                                                                                                                                                    |
| Total MoC waste                                | 7.31         |  | Mixed plastics (waste treatment) {GLO}  recycling of mixed plastics   APOS, U; Waste polyethylene, for recycling, sorted {Europe without Switzerland}  treatment of waste polyethylene, for recycling, unsorted, sorting   APOS, U; Polyethylene, high density, granulate, recycled {Europe without Switzerland}  polyethylene production, high density, granulate, recycled   APOS, U | A net scrap approach was used for some of the materials specifically PVC as it has the highest percentage share of the waste and better data on recycling and product information. Waste PE data was also used in some instances as reference material for the plastic components. |
